# Supplementary material
Source: publisher site journal article supplement (https://www.dovepress.com/article/supplementary_file/537890/537890%20Revised%20appendix%20%25281%2529.docx)
Supplement: Supplementary file 1 [file 537890%20Revised%20appendix%20%25281%2529.docx]

**Appendix1** Consolidated criteria for reporting qualitative studies (COREQ): 32-item checklist

| **Item No.** | **Topic** | **Guide Questions/Description** | **Reported in this study** |
| --- | --- | --- | --- |
| **Domain 1: Research team and reflexivity** | | | |
| ***Personal Characteristics*** | | | |
| 1 | Interviewer/facilitator | Which author/s conducted the interview? | The first author |
| 2 | Credentials | What were the researcher’s credentials? | Postgraduate student majoring in Integrated Traditional Chinese and Western Medicine clinical practice,Certified doctor |
| 3 | Occupation | What was their occupation at the time of the study? | Certified doctor |
| 4 | Gender | Was the researcher male or female? | Male |
| 5 | Experience and training | What experience or training did the researcher have? | Trained in qualitative research |
| ***Relationship with participants*** | | | |
| 6 | Relationship established | Was a relationship established prior to study commencement? | Yes |
| 7 | Participant knowledge of the interviewer | What did the participants know about the researcher? e.g., personal goals, reasons for doing the research | Participants were informed of the purpose and reasons for doing the research |
| 8 | Interviewer characteristics | What characteristics were reported about the interviewer/facilitator? e.g. Bias, assumptions, reasons and interests in the research topic | The interviewer remained impartial, objective, and nonjudgmental |
| **Domain 2: study design** | | | |
| ***Theoretical framework*** | | | |
| 9 | Methodological orientation and Theory | What methodological orientation was stated to underpin the study? e.g. grounded theory, discourse analysis, ethnography, phenomenology, content analysis | Phenomenology analysis |
| ***Participant selection*** | | | |
| 10 | Sampling | How were participants selected? e.g. purposive, convenience, consecutive, snowball | Purposive |
| 11 | Method of approach | How were participants approached? e.g. face-to-face, telephone, mail, email | Face to Face |
| 12 | Sample size | How many participants were in the study? | Sixteen (16) |
| 13 | Non-participation | How many people refused to participate or dropped out? Reasons? | None |
| ***Setting*** | | | |
| 14 | Setting of data collection | Where was the data collected? e.g. home, clinic, workplace | Hospital ward |
| 15 | Presence of non-participants | Was anyone else present besides the participants and researchers? | No |
| 16 | Description of sample | What are the important characteristics of the sample? e.g. demographic data, date | Demographics and disease-related characteristics |
| ***Data collection*** | | | |
| 17 | Interview guide | Were questions, prompts, guides provided by the authors? Was it pilot tested? | Interview guideline provided by the research team and pre-interviews were conducted by the first author |
| 18 | Repeat interviews | Were repeat interviews carried out? If yes, how many? | No |
| 19 | Audio/visual recording | Did the research use audio or visual recording to collect the data? | The research used audio recording to collect the data |
| 20 | Field notes | Were field notes made during and/or after the interview? | Yes |
| 21 | Duration | What was the duration of the interviews? | 15 to 45 minutes |
| 22 | Data saturation | Was data saturation discussed? | Yes |
| 23 | Transcripts returned | Were transcripts returned to participants for comment and/or correction? | Yes |
| **Domain 3: analysis and findings** | | | |
| ***Data analysis*** | | | |
| 24 | Number of data coders | How many data coders coded the data? | Two (2) |
| 25 | Description of the coding tree | Did authors provide a description of the coding tree? | Yes |
| 26 | Derivation of themes | Were themes identified in advance or derived from the data? | Derived from the data |
| 27 | Software | What software, if applicable, was used to manage the data? | MAXQDA2022 |
| 28 | Participant checking | Did participants provide feedback on the findings? | Yes |
| ***Reporting*** | | | |
| 29 | Quotations presented | Were participant quotations presented to illustrate the themes / findings? Was each quotation identified? e.g. participant number | Yes |
| 30 | Data and findings consistent | Was there consistency between the data presented and the findings? | Yes |
| 31 | Clarity of major themes | Were major themes clearly presented in the findings? | Yes |
| 32 | Clarity of minor themes | Is there a description of diverse cases or discussion of minor themes? | Yes |
